# Supplementary material for: Whole genome surveys of rice, maize and sorghum reveal multiple horizontal transfers of the LTR-retrotransposon Route66 in Poaceae
Source: PubMed Central journal article supplement (PMC2664808; doi:10.1186/1471-2148-9-58), 2009-03-16
Supplement: 1471-2148-9-58-S1.pdf [file 1471-2148-9-58-S1.pdf]

|      | sb2  | sb4  | sb3  | sb5  | zm2  | zm3  | zm1  | osj1 | osj2 | osil | sb1  | zm4   | zm5  | zm7  | zm6  | zm9  | zm11  | zm12 | zm10 | zm8 |
|------|------|------|------|------|------|------|------|------|------|------|------|-------|------|------|------|------|-------|------|------|-----|
| sb2  |      |      |      |      |      |      |      |      |      |      |      |       |      |      |      |      |       |      |      |     |
| sb4  | 98,3 |      |      |      |      |      |      |      |      |      |      |       |      |      |      |      |       |      |      |     |
| sb3  | 98,3 | 98,3 |      |      |      |      |      |      |      |      |      |       |      |      |      |      |       |      |      |     |
| sb5  | 95,1 | 95,1 | 94,9 |      |      |      |      |      |      |      |      |       |      |      |      |      |       |      |      |     |
| zm2  | 89,1 | 89,3 | 89,2 | 87,1 |      |      |      |      |      |      |      |       |      |      |      |      |       |      |      |     |
| zm3  | 90,5 | 90,8 | 90,7 | 88,3 | 93,8 |      |      |      |      |      |      |       |      |      |      |      |       |      |      |     |
| zm1  | 91,2 | 91,4 | 91,3 | 89,0 | 93,5 | 95,2 |      |      |      |      |      |       |      |      |      |      |       |      |      |     |
| osj1 | 89,4 | 89,2 | 89,4 | 86,6 | 87,2 | 88,6 | 89,2 |      |      |      |      |       |      |      |      |      |       |      |      |     |
| osj2 | 89,2 | 89,1 | 89,3 | 86,5 | 87,0 | 88,5 | 89,0 | 99,4 |      |      |      |       |      |      |      |      |       |      |      |     |
| osil | 89,0 | 89,0 | 89,1 | 86,3 | 87,0 | 88,4 | 88,9 | 99,1 | 99,5 |      |      |       |      |      |      |      |       |      |      |     |
| sb1  | 87,7 | 87,7 | 87,9 | 85,4 | 86,5 | 87,7 | 88,1 | 95,4 | 95,3 | 95,2 |      |       |      |      |      |      |       |      |      |     |
| zm4  | 87,5 | 87,3 | 87,7 | 85,0 | 85,6 | 86,6 | 87,2 | 92,0 | 91,9 | 91,8 | 90,8 |       |      |      |      |      |       |      |      |     |
| zm5  | 87,5 | 87,3 | 87,7 | 85,0 | 85,6 | 86,6 | 87,2 | 92,0 | 91,9 | 91,8 | 90,8 | 100,0 |      |      |      |      |       |      |      |     |
| zm7  | 87,4 | 87,1 | 87,5 | 84,6 | 85,2 | 86,5 | 87,0 | 91,5 | 91,3 | 91,2 | 89,9 | 96,9  | 96,9 |      |      |      |       |      |      |     |
| zm6  | 88,0 | 87,7 | 88,0 | 85,4 | 86,0 | 86,9 | 87,6 | 92,3 | 92,1 | 92,0 | 90,9 | 97,8  | 97,8 | 98,4 |      |      |       |      |      |     |
| zm9  | 88,1 | 87,8 | 88,2 | 85,5 | 85,9 | 87,1 | 87,9 | 92,4 | 92,3 | 92,2 | 91,0 | 97,9  | 97,9 | 98,6 | 99,1 |      |       |      |      |     |
| zm11 | 88,1 | 87,8 | 88,1 | 85,4 | 85,9 | 87,0 | 87,7 | 92,4 | 92,3 | 92,1 | 91,0 | 97,9  | 97,9 | 98,3 | 99,0 | 99,4 |       |      |      |     |
| zm12 | 88,1 | 87,8 | 88,1 | 85,4 | 85,9 | 87,0 | 87,7 | 92,4 | 92,3 | 92,1 | 91,0 | 97,9  | 97,9 | 98,3 | 99,0 | 99,4 | 100,0 |      |      |     |
| zm10 | 88,2 | 87,8 | 88,2 | 85,5 | 86,0 | 87,1 | 87,9 | 92,4 | 92,3 | 92,1 | 91,1 | 97,9  | 97,9 | 98,6 | 99,1 | 99,5 | 99,5  | 99,5 | 99,5 |     |
| zm8  | 88,2 | 87,9 | 88,2 | 85,6 | 86,0 | 87,1 | 87,7 | 92,5 | 92,4 | 92,2 | 91,0 | 97,8  | 97,8 | 98,7 | 99,1 | 99,3 | 99,1  | 99,1 | 99,2 |     |
