# Supplementary material for: Whole genome surveys of rice, maize and sorghum reveal multiple horizontal transfers of the LTR-retrotransposon Route66 in Poaceae
Source: PubMed Central journal article supplement (PMC2664808; doi:10.1186/1471-2148-9-58), 2009-03-16
Supplement: 1471-2148-9-58-S3.pdf [file 1471-2148-9-58-S3.pdf]

|         | sb2   | sb4  | sb3  | sb5  | zm2  | zm3  | zm1  | osj1 | osj2  | osi1 | sb1  | zm4   | zm5  | zm7  | zm6  | zm9  | zm11  | zm12 | zm10 | zm8  | O.rufi | O.lo | O.rid | zmm  | zmp  | sd   | sae  | sa   | sv   | pa   | pb   | sp   | sr   | soff | ssp |  |  |  |
|---------|-------|------|------|------|------|------|------|------|-------|------|------|-------|------|------|------|------|-------|------|------|------|--------|------|-------|------|------|------|------|------|------|------|------|------|------|------|-----|--|--|--|
| sb2     |       |      |      |      |      |      |      |      |       |      |      |       |      |      |      |      |       |      |      |      |        |      |       |      |      |      |      |      |      |      |      |      |      |      |     |  |  |  |
| sb4     | 100,0 |      |      |      |      |      |      |      |       |      |      |       |      |      |      |      |       |      |      |      |        |      |       |      |      |      |      |      |      |      |      |      |      |      |     |  |  |  |
| sb3     | 100,0 | 98,0 |      |      |      |      |      |      |       |      |      |       |      |      |      |      |       |      |      |      |        |      |       |      |      |      |      |      |      |      |      |      |      |      |     |  |  |  |
| sb5     | 96,3  | 96,4 | 95,3 |      |      |      |      |      |       |      |      |       |      |      |      |      |       |      |      |      |        |      |       |      |      |      |      |      |      |      |      |      |      |      |     |  |  |  |
| zm2     | 89,0  | 89,0 | 88,6 | 88,2 |      |      |      |      |       |      |      |       |      |      |      |      |       |      |      |      |        |      |       |      |      |      |      |      |      |      |      |      |      |      |     |  |  |  |
| zm3     | 89,7  | 89,7 | 89,2 | 88,4 | 94,9 |      |      |      |       |      |      |       |      |      |      |      |       |      |      |      |        |      |       |      |      |      |      |      |      |      |      |      |      |      |     |  |  |  |
| zm1     | 89,8  | 89,8 | 89,3 | 88,0 | 94,1 | 95,4 |      |      |       |      |      |       |      |      |      |      |       |      |      |      |        |      |       |      |      |      |      |      |      |      |      |      |      |      |     |  |  |  |
| osj1    | 86,5  | 86,7 | 86,0 | 84,6 | 87,1 | 88,6 | 88,5 |      |       |      |      |       |      |      |      |      |       |      |      |      |        |      |       |      |      |      |      |      |      |      |      |      |      |      |     |  |  |  |
| osj2    | 86,9  | 87,0 | 86,4 | 85,0 | 87,0 | 88,6 | 88,5 | 99,4 |       |      |      |       |      |      |      |      |       |      |      |      |        |      |       |      |      |      |      |      |      |      |      |      |      |      |     |  |  |  |
| osi1    | 86,9  | 87,0 | 86,4 | 85,0 | 87,0 | 88,6 | 88,5 | 99,4 | 100,0 |      |      |       |      |      |      |      |       |      |      |      |        |      |       |      |      |      |      |      |      |      |      |      |      |      |     |  |  |  |
| sb1     | 85,7  | 85,9 | 85,4 | 84,2 | 86,7 | 88,3 | 89,0 | 95,2 | 95,3  | 95,3 |      |       |      |      |      |      |       |      |      |      |        |      |       |      |      |      |      |      |      |      |      |      |      |      |     |  |  |  |
| zm4     | 85,0  | 85,1 | 84,4 | 83,0 | 84,3 | 85,4 | 85,7 | 90,1 | 90,5  | 90,5 | 89,9 |       |      |      |      |      |       |      |      |      |        |      |       |      |      |      |      |      |      |      |      |      |      |      |     |  |  |  |
| zm5     | 85,0  | 85,1 | 84,4 | 83,0 | 84,3 | 85,4 | 85,7 | 90,1 | 90,5  | 90,5 | 89,9 | 100,0 |      |      |      |      |       |      |      |      |        |      |       |      |      |      |      |      |      |      |      |      |      |      |     |  |  |  |
| zm7     | 84,6  | 84,7 | 83,9 | 82,4 | 83,8 | 85,0 | 85,3 | 90,0 | 90,4  | 90,4 | 89,7 | 97,3  | 97,3 |      |      |      |       |      |      |      |        |      |       |      |      |      |      |      |      |      |      |      |      |      |     |  |  |  |
| zm6     | 85,7  | 85,8 | 85,0 | 83,2 | 84,8 | 85,9 | 86,2 | 91,0 | 91,4  | 91,4 | 90,8 | 97,8  | 97,8 | 98,5 |      |      |       |      |      |      |        |      |       |      |      |      |      |      |      |      |      |      |      |      |     |  |  |  |
| zm9     | 86,0  | 86,1 | 85,2 | 83,5 | 84,9 | 86,3 | 86,6 | 91,1 | 91,5  | 91,5 | 90,8 | 98,0  | 98,0 | 98,8 | 99,3 |      |       |      |      |      |        |      |       |      |      |      |      |      |      |      |      |      |      |      |     |  |  |  |
| zm11    | 85,8  | 86,0 | 85,1 | 83,4 | 84,8 | 86,2 | 86,5 | 91,3 | 91,7  | 91,7 | 90,9 | 97,9  | 97,9 | 98,4 | 99,0 | 99,4 |       |      |      |      |        |      |       |      |      |      |      |      |      |      |      |      |      |      |     |  |  |  |
| zm12    | 85,8  | 86,0 | 85,1 | 83,4 | 84,8 | 86,2 | 86,5 | 91,3 | 91,7  | 91,7 | 90,9 | 97,9  | 97,9 | 98,4 | 99,0 | 99,4 | 100,0 |      |      |      |        |      |       |      |      |      |      |      |      |      |      |      |      |      |     |  |  |  |
| zm10    | 85,8  | 86,0 | 85,1 | 83,4 | 84,8 | 86,2 | 86,5 | 91,3 | 91,7  | 91,7 | 90,9 | 98,0  | 98,0 | 98,6 | 99,2 | 99,7 | 99,7  | 99,7 |      |      |        |      |       |      |      |      |      |      |      |      |      |      |      |      |     |  |  |  |
| zm8     | 85,5  | 85,7 | 85,0 | 83,2 | 84,4 | 85,8 | 86,1 | 90,9 | 91,3  | 91,3 | 90,5 | 97,9  | 97,9 | 98,9 | 99,2 | 99,4 | 99,1  | 99,1 | 99,3 |      |        |      |       |      |      |      |      |      |      |      |      |      |      |      |     |  |  |  |
| O.rufi  | 85,6  | 85,7 | 84,8 | 83,4 | 85,3 | 87,3 | 86,6 | 97,0 | 97,6  | 97,6 | 93,2 | 88,5  | 88,5 | 88,7 | 89,4 | 89,6 | 89,7  | 89,7 | 89,7 | 89,3 |        |      |       |      |      |      |      |      |      |      |      |      |      |      |     |  |  |  |
| O.longi | 86,8  | 86,9 | 86,2 | 84,8 | 87,1 | 88,6 | 88,5 | 98,6 | 98,7  | 98,7 | 95,6 | 90,4  | 90,4 | 90,4 | 91,4 | 91,5 | 91,6  | 91,6 | 91,6 | 91,2 | 96,6   |      |       |      |      |      |      |      |      |      |      |      |      |      |     |  |  |  |
| O.rid   | 84,8  | 85,0 | 84,2 | 83,3 | 84,9 | 86,7 | 86,6 | 95,3 | 95,4  | 95,4 | 92,9 | 88,8  | 88,8 | 88,5 | 89,3 | 89,6 | 89,7  | 89,7 | 89,7 | 89,3 | 93,4   | 95,8 |       |      |      |      |      |      |      |      |      |      |      |      |     |  |  |  |
| zmm     | 85,5  | 85,6 | 84,8 | 83,1 | 84,3 | 85,7 | 86,0 | 90,1 | 90,5  | 90,5 | 89,8 | 97,3  | 97,3 | 98,1 | 98,6 | 99,3 | 98,9  | 98,9 | 99,0 | 98,7 | 88,6   | 90,5 | 88,5  |      |      |      |      |      |      |      |      |      |      |      |     |  |  |  |
| zmp     | 85,5  | 85,6 | 84,8 | 83,2 | 84,9 | 86,1 | 86,4 | 91,0 | 91,4  | 91,4 | 90,8 | 97,8  | 97,8 | 98,5 | 99,0 | 99,4 | 99,7  | 99,7 | 99,7 | 99,1 | 89,4   | 91,4 | 89,3  | 98,8 |      |      |      |      |      |      |      |      |      |      |     |  |  |  |
| sd      | 84,5  | 84,6 | 83,9 | 83,7 | 86,0 | 88,3 | 88,3 | 95,2 | 95,3  | 95,3 | 99,7 | 89,5  | 89,5 | 89,4 | 90,0 | 90,0 | 90,4  | 90,4 | 90,2 | 89,6 | 92,2   | 95,7 | 91,8  | 89,1 | 89,9 |      |      |      |      |      |      |      |      |      |     |  |  |  |
| sae     | 84,0  | 84,0 | 83,4 | 83,2 | 85,7 | 88,0 | 88,0 | 95,0 | 95,2  | 95,2 | 99,5 | 89,3  | 89,3 | 89,2 | 89,8 | 89,8 | 90,2  | 90,2 | 90,0 | 89,4 | 92,0   | 95,6 | 92,2  | 88,9 | 89,7 | 99,5 |      |      |      |      |      |      |      |      |     |  |  |  |
| sae     | 85,3  | 85,4 | 85,3 | 83,8 | 86,4 | 88,2 | 87,8 | 94,7 | 94,9  | 94,9 | 96,6 | 88,6  | 88,6 | 88,5 | 89,4 | 89,4 | 89,5  | 89,5 | 89,3 | 92,6 | 95,1   | 92,5 | 88,2  | 89,2 | 95,9 | 95,7 |      |      |      |      |      |      |      |      |     |  |  |  |
| sv      | 85,9  | 86,1 | 85,6 | 84,6 | 86,8 | 88,2 | 88,8 | 95,1 | 95,2  | 95,2 | 99,6 | 89,9  | 89,9 | 89,7 | 90,8 | 90,8 | 90,9  | 90,9 | 90,5 | 93,1 | 95,5   | 92,8 | 89,6  | 90,6 | 99,7 | 99,5 | 96,5 |      |      |      |      |      |      |      |     |  |  |  |
| pa      | 89,2  | 89,0 | 88,7 | 86,9 | 89,0 | 91,2 | 90,9 | 92,1 | 92,2  | 92,2 | 92,2 | 88,3  | 88,3 | 88,1 | 89,0 | 89,3 | 89,3  | 89,3 | 88,9 | 90,9 | 92,3   | 90,2 | 88,3  | 88,9 | 91,5 | 91,4 | 91,2 | 92,0 |      |      |      |      |      |      |     |  |  |  |
| pb      | 89,4  | 89,1 | 88,7 | 87,0 | 89,0 | 91,2 | 90,9 | 92,2 | 92,3  | 92,3 | 92,4 | 88,5  | 88,5 | 88,2 | 89,2 | 89,4 | 89,4  | 89,4 | 89,0 | 90,9 | 92,4   | 90,2 | 88,4  | 89,0 | 91,5 | 91,3 | 91,3 | 92,1 | 99,8 |      |      |      |      |      |     |  |  |  |
| sp      | 84,8  | 84,9 | 84,7 | 83,3 | 86,0 | 87,9 | 87,5 | 94,5 | 94,6  | 94,6 | 95,3 | 88,2  | 88,2 | 88,0 | 88,9 | 88,9 | 89,0  | 89,0 | 89,0 | 88,7 | 92,4   | 94,9 | 92,5  | 87,8 | 88,7 | 95,3 | 95,1 | 97,8 | 95,2 | 91,0 | 91,0 |      |      |      |     |  |  |  |
| sr      | 84,9  | 85,0 | 84,4 | 83,4 | 85,1 | 86,5 | 86,3 | 94,4 | 94,6  | 94,6 | 93,1 | 87,7  | 87,7 | 87,8 | 88,4 | 88,7 | 88,8  | 88,8 | 88,4 | 92,7 | 94,9   | 93,1 | 87,7  | 88,4 | 92,2 | 91,9 | 93,7 | 93,0 | 90,9 | 90,9 | 90,9 | 93,8 |      |      |     |  |  |  |
| soff    | 85,6  | 85,7 | 85,2 | 83,8 | 85,6 | 87,1 | 86,8 | 95,5 | 95,5  | 95,5 | 94,1 | 89,0  | 89,0 | 88,8 | 89,6 | 89,9 | 90,0  | 90,0 | 90,0 | 89,6 | 94,0   | 96,0 | 94,1  | 88,9 | 89,8 | 92,7 | 92,5 | 94,8 | 94,0 | 92,0 | 92,1 | 94,9 | 97,7 |      |     |  |  |  |
| ssp     | 84,6  | 84,7 | 84,2 | 82,6 | 84,5 | 85,7 | 85,8 | 94,0 | 94,0  | 94,0 | 92,9 | 88,2  | 88,2 | 88,1 | 88,6 | 88,9 | 89,0  | 89,0 | 89,0 | 88,9 | 92,2   | 94,4 | 92,7  | 87,8 | 88,6 | 91,7 | 91,5 | 93,0 | 93,1 | 90,2 | 90,2 | 93,2 | 95,6 | 97,1 |     |  |  |  |
